# Supplementary material for: Comparative transcriptomics analysis of contrasting varieties of Eucalyptus camaldulensis reveals wind resistance genes
Source: PeerJ. 2022 Feb 24;10:e12954. doi: 10.7717/peerj.12954 (PMC8882336; doi:10.7717/peerj.12954)
Supplement: Supplemental Information 2 [file peerj-10-12954-s002.xlsx]

## Sheet: Sheet1
Table S2： Reaction system of qRT-PCR
Components	Final concentration	Loading volume (μL)
2×SYBR® Green Supermix	1×	5
Forward primer	200nM	0.5
Reverse primer	200nM	0.5
cDNA	N/A	1
ddH2O	N/A	3
