# Supplementary material for: Comparative transcriptomics analysis of contrasting varieties of Eucalyptus camaldulensis reveals wind resistance genes
Source: PeerJ. 2022 Feb 24;10:e12954. doi: 10.7717/peerj.12954 (PMC8882336; doi:10.7717/peerj.12954)
Supplement: Supplemental Information 8 [file peerj-10-12954-s008.xlsx]

## Sheet: sheet 1
Table S8: The numbers of DEGs in different KEGG pathways
	735	C037 0h vs C037 24h	C037 0h vs CA5 0h	C037 24h vs CA5 24h	CA2 0h vs CA5 24h
#Pathway	ko_ID	Unigene	Unigene	Unigene	Unigene
Glycolysis / Gluconeogenesis	ko00010	9	30	6	8
Citrate cycle (TCA cycle)	ko00020	2	15	2	2
Pentose phosphate pathway	ko00030	2	15	1	8
Pentose and glucuronate interconversions	ko00040	2	18	3	13
Fructose and mannose metabolism	ko00051	2	20	2	4
Galactose metabolism	ko00052	1	11	3	6
Ascorbate and aldarate metabolism	ko00053	3	4	1	5
Fatty acid biosynthesis	ko00061	0	6	2	1
Fatty acid elongation	ko00062	0	2	1	1
Fatty acid degradation	ko00071	3	5	4	3
Synthesis and degradation of ketone bodies	ko00072	0	1	1	0
Cutin, suberine and wax biosynthesis	ko00073	0	5	3	8
Steroid biosynthesis	ko00100	0	4	1	6
Ubiquinone and other terpenoid-quinone biosynthesis	ko00130	0	11	7	6
Oxidative phosphorylation	ko00190	1	16	5	5
Photosynthesis	ko00195	1	5	0	2
Arginine biosynthesis	ko00220	0	8	2	6
Purine metabolism	ko00230	0	26	5	15
Caffeine metabolism	ko00232	0	1	0	0
Pyrimidine metabolism	ko00240	1	22	5	11
Alanine, aspartate and glutamate metabolism	ko00250	1	9	5	9
Glycine, serine and threonine metabolism	ko00260	2	19	8	9
Monobactam biosynthesis	ko00261	0	6	3	1
Cysteine and methionine metabolism	ko00270	2	27	15	26
Valine, leucine and isoleucine degradation	ko00280	2	11	4	1
Valine, leucine and isoleucine biosynthesis	ko00290	0	3	2	4
Lysine biosynthesis	ko00300	0	7	4	1
Lysine degradation	ko00310	2	0	0	2
Arginine and proline metabolism	ko00330	2	14	2	11
Histidine metabolism	ko00340	2	1	0	2
Tyrosine metabolism	ko00350	1	10	7	7
Phenylalanine metabolism	ko00360	0	22	13	15
Tryptophan metabolism	ko00380	2	4	2	3
Phenylalanine, tyrosine and tryptophan biosynthesis	ko00400	1	21	4	12
beta-Alanine metabolism	ko00410	3	15	5	5
Taurine and hypotaurine metabolism	ko00430	1	1	2	1
Selenocompound metabolism	ko00450	1	8	6	6
Cyanoamino acid metabolism	ko00460	0	7	4	4
Glutathione metabolism	ko00480	1	23	4	11
Starch and sucrose metabolism	ko00500	3	53	22	26
N-Glycan biosynthesis	ko00510	0	3	0	0
Other glycan degradation	ko00511	0	1	0	1
Other types of O-glycan biosynthesis	ko00514	0	2	0	1
Amino sugar and nucleotide sugar metabolism	ko00520	2	40	12	15
Glycosaminoglycan degradation	ko00531	3	3	0	1
Glycerolipid metabolism	ko00561	2	12	2	4
Inositol phosphate metabolism	ko00562	0	13	3	12
Glycosylphosphatidylinositol(GPI)-anchor biosynthesis	ko00563	3	3	1	0
Glycerophospholipid metabolism	ko00564	2	22	3	14
Ether lipid metabolism	ko00565	0	7	2	9
Arachidonic acid metabolism	ko00590	1	5	2	0
Linoleic acid metabolism	ko00591	1	8	7	3
alpha-Linolenic acid metabolism	ko00592	0	5	6	3
Sphingolipid metabolism	ko00600	0	5	1	0
Glycosphingolipid biosynthesis - globo series	ko00603	0	1	1	0
Glycosphingolipid biosynthesis - ganglio series	ko00604	0	1	0	0
Pyruvate metabolism	ko00620	5	17	3	2
Glyoxylate and dicarboxylate metabolism	ko00630	0	19	11	16
Propanoate metabolism	ko00640	0	12	3	2
Butanoate metabolism	ko00650	1	2	3	2
C5-Branched dibasic acid metabolism	ko00660	0	2	0	2
One carbon pool by folate	ko00670	0	7	3	4
Carbon fixation in photosynthetic organisms	ko00710	0	12	3	2
Thiamine metabolism	ko00730	0	2	0	1
Riboflavin metabolism	ko00740	0	1	0	0
Vitamin B6 metabolism	ko00750	0	3	0	1
Nicotinate and nicotinamide metabolism	ko00760	0	4	1	1
Pantothenate and CoA biosynthesis	ko00770	0	6	3	4
Biotin metabolism	ko00780	0	2	1	0
Folate biosynthesis	ko00790	1	4	1	1
Porphyrin and chlorophyll metabolism	ko00860	0	3	0	3
Terpenoid backbone biosynthesis	ko00900	0	5	0	3
Monoterpenoid biosynthesis	ko00902	0	1	0	0
Diterpenoid biosynthesis	ko00904	0	2	0	2
Diterpenoid biosynthesis	ko00904	0	0	0	3
Carotenoid biosynthesis	ko00906	1	8	0	9
Zeatin biosynthesis	ko00908	1	1	1	4
Sesquiterpenoid and triterpenoid biosynthesis	ko00909	0	2	0	1
Nitrogen metabolism	ko00910	0	10	3	10
Sulfur metabolism	ko00920	0	3	2	2
Phenylpropanoid biosynthesis	ko00940	4	39	24	25
Flavonoid biosynthesis	ko00941	0	14	8	9
Flavone and flavonol biosynthesis	ko00944	0	0	0	2
Stilbenoid, diarylheptanoid and gingerol biosynthesis	ko00945	0	10	7	7
Isoquinoline alkaloid biosynthesis	ko00950	0	6	3	3
Tropane, piperidine and pyridine alkaloid biosynthesis	ko00960	0	9	3	4
Aminoacyl-tRNA biosynthesis	ko00970	0	5	3	0
Biosynthesis of unsaturated fatty acids	ko01040	0	2	0	0
Carbon metabolism	ko01200	6	62	18	22
2-Oxocarboxylic acid metabolism	ko01210	0	8	3	8
Fatty acid metabolism	ko01212	0	11	4	1
Biosynthesis of amino acids	ko01230	5	68	26	39
Vancomycin resistance	ko01502	0	1	0	1
ABC transporters	ko02010	0	5	3	3
Ribosome biogenesis in eukaryotes	ko03008	0	17	2	6
Ribosome	ko03010	0	11	9	31
RNA transport	ko03013	1	22	8	8
mRNA surveillance pathway	ko03015	0	17	10	3
RNA degradation	ko03018	2	16	2	0
RNA polymerase	ko03020	0	6	2	1
Basal transcription factors	ko03022	0	1	3	0
DNA replication	ko03030	0	3	0	2
Spliceosome	ko03040	4	27	12	0
Proteasome	ko03050	0	3	0	1
Protein export	ko03060	0	2	0	1
Base excision repair	ko03410	0	9	4	4
Nucleotide excision repair	ko03420	0	1	0	2
Mismatch repair	ko03430	0	1	1	1
Homologous recombination	ko03440	0	6	3	1
Non-homologous end-joining	ko03450	1	2	1	0
Phosphatidylinositol signaling system	ko04070	7	17	3	6
Plant hormone signal transduction	ko04075	1	26	16	19
Ubiquitin mediated proteolysis	ko04120	0	17	5	5
Sulfur relay system	ko04122	0	1	0	0
SNARE interactions in vesicular transport	ko04130	0	4	0	1
Regulation of autophagy	ko04140	0	4	1	1
Protein processing in endoplasmic reticulum	ko04141	21	15	7	9
Endocytosis	ko04144	2	38	3	17
Phagosome	ko04145	0	27	3	12
Peroxisome	ko04146	1	11	3	7
Plant-pathogen interaction	ko04626	4	28	13	13
Circadian rhythm - plant	ko04712	1	6	3	0
AGE-RAGE signaling pathway in diabetic complications	ko04933	0	10	2	8
