# Supplementary material for: Comparative transcriptomics analysis of contrasting varieties of Eucalyptus camaldulensis reveals wind resistance genes
Source: PeerJ. 2022 Feb 24;10:e12954. doi: 10.7717/peerj.12954 (PMC8882336; doi:10.7717/peerj.12954)
Supplement: Supplemental Information 11 [file peerj-10-12954-s011.xlsx]

## Sheet: Sheet1
Table S11: Expression levels of differentially expressed transcription factors
	Gene ID	Annotation	FPKM value
			C037 0h	C037 24h	CA5 0h	CA5 24h
1	Eucalyptus_camaldulensis_newGene_1187	bHLH	23.729	9.151	13.306	4.129
2	Eucalyptus_camaldulensis_newGene_13662	bHLH	4.063	9.42	5.723	14.132
3	Eucalyptus_camaldulensis_newGene_17513	bHLH	2.332	1.395	0.396	0.259
4	Eucalyptus_camaldulensis_newGene_20361	bHLH	3.129	1.723	21.125	10.559
5	Eucalyptus_camaldulensis_newGene_23345	bHLH	0.401	0.509	0	0.027
6	Eucalyptus_camaldulensis_newGene_30725	bHLH	1.313	0.06	4.469	3.638
7	Eucalyptus_camaldulensis_newGene_35134	bHLH	5.004	3.692	32.587	5.629
8	Eucalyptus_camaldulensis_newGene_73050	bHLH	66.399	33.227	29.55	9.443
9	Gene005248	bHLH	6.477	5.54	8.927	3.774
10	Gene007589	bHLH	11.511	3.498	28.987	41.633
11	Gene008666	bHLH	1.124	0.122	6.298	3.767
12	Gene009085	bHLH	14.05	18.197	32.052	30.116
13	Eucalyptus_camaldulensis_newGene_74435	C3H	668.46	412.887	146.809	144.067
14	Eucalyptus_camaldulensis_newGene_38983	LIM	3.222	1.606	94.732	30.205
15	Gene001707	LIM	18.811	9.773	51.081	16.725
16	Gene012832	LIM	46.746	29.569	412.74	103.752
17	Eucalyptus_camaldulensis_newGene_13391	MADS-M-type	0.804	0.521	3.989	0.726
18	Eucalyptus_camaldulensis_newGene_24402	MADS-M-type	4.395	4.573	4.933	1.873
19	Eucalyptus_camaldulensis_newGene_25136	MADS-M-type	0.038	0.233	2.642	1.445
20	Eucalyptus_camaldulensis_newGene_35101	MADS-M-type	4.486	4.675	5.048	1.999
21	Eucalyptus_camaldulensis_newGene_11235	MYB	0	0.044	1.183	0.396
22	Eucalyptus_camaldulensis_newGene_11842	MYB	0.116	0	1.033	0.601
23	Eucalyptus_camaldulensis_newGene_12734	MYB	2.723	1.216	60.679	23.949
24	Eucalyptus_camaldulensis_newGene_12749	MYB	0	1.385	0	6.175
25	Eucalyptus_camaldulensis_newGene_14693	MYB	2.115	1.635	20.238	5.003
26	Eucalyptus_camaldulensis_newGene_23417	MYB	0.635	0.163	5.636	2.666
27	Eucalyptus_camaldulensis_newGene_25787	MYB	0.777	1.352	25.552	5.668
28	Eucalyptus_camaldulensis_newGene_26480	MYB	10.044	46.039	9.973	38.012
29	Eucalyptus_camaldulensis_newGene_2841	MYB	0.159	0.19	0.091	3.752
30	Eucalyptus_camaldulensis_newGene_32883	MYB	10.286	34.322	8.754	29.182
31	Eucalyptus_camaldulensis_newGene_33180	MYB	0.914	19.387	2.357	38.218
32	Eucalyptus_camaldulensis_newGene_3518	MYB	1.525	0.251	10.457	2.724
33	Eucalyptus_camaldulensis_newGene_35442	MYB	0.163	0.441	0	3.87
34	Eucalyptus_camaldulensis_newGene_74802	MYB	1.726	0.936	26.297	5.915
35	Eucalyptus_camaldulensis_newGene_8075	MYB	0.709	0.201	12.629	2.878
36	Gene002475	MYB	0.94	1.25	24.386	5.323
37	Gene003048	MYB	65.745	131.177	53.002	56.31
38	Gene004171	MYB	4.26	3.777	17.034	4.533
39	Gene009922	MYB	2.269	1.928	11.901	4.9
40	Gene011257	MYB	25.255	39.104	3.838	10.591
41	Eucalyptus_camaldulensis_newGene_23590	MYB-related	1.634	3.638	4.301	6.473
42	Eucalyptus_camaldulensis_newGene_30738	MYB-related	4.331	0.79	46.658	18.097
43	Eucalyptus_camaldulensis_newGene_35997	MYB-related	15.317	55.842	5.175	38.936
44	Eucalyptus_camaldulensis_newGene_42461	MYB-related	3.796	1.943	68.898	23.097
45	Eucalyptus_camaldulensis_newGene_42836	MYB-related	0	0	3.043	0.748
46	Eucalyptus_camaldulensis_newGene_67785	MYB-related	2.858	5.061	0.621	5.777
47	Gene007676	MYB-related	10.232	5.031	3.811	24.324
48	Gene008441	MYB-related	2.61	7.888	12.528	8.746
49	Eucalyptus_camaldulensis_newGene_19196	NAC	2.625	1.308	33.027	12.161
50	Eucalyptus_camaldulensis_newGene_27222	NAC	2.74	3.104	5.344	1.058
51	Eucalyptus_camaldulensis_newGene_27223	NAC	0.236	0.077	2.261	1.956
52	Eucalyptus_camaldulensis_newGene_34750	NAC	0.649	0.17	3.21	3.524
53	Eucalyptus_camaldulensis_newGene_36956	NAC	1.542	0.578	0.007	0.661
54	Eucalyptus_camaldulensis_newGene_44965	NAC	19.676	79.484	4.567	86.481
55	Eucalyptus_camaldulensis_newGene_45480	NAC	15.398	39.857	0.189	22.485
56	Eucalyptus_camaldulensis_newGene_53726	NAC	0.329	0.313	6.787	7.841
57	Eucalyptus_camaldulensis_newGene_5820	NAC	0.131	0	3.264	1.378
58	Eucalyptus_camaldulensis_newGene_66738	NAC	0.236	0.235	1.758	1.19
59	Eucalyptus_camaldulensis_newGene_68117	NAC	1.847	0.913	0	0.266
60	Eucalyptus_camaldulensis_newGene_9011	NAC	0.603	0.13	0.032	1.303
61	Gene004569	NAC	8.138	12.736	194.203	46.376
62	Gene004903	NAC	1.399	0.703	11.781	3.432
63	Gene010621	NAC	6.499	4.33	84.187	22.425
64	Eucalyptus_camaldulensis_newGene_28290	SBP	5.631	6.888	26.753	21.01
65	Eucalyptus_camaldulensis_newGene_62107	SBP	3.416	7.087	15.701	11.472
66	Gene006631	SBP	1.315	6.197	13.521	6.044
67	Eucalyptus_camaldulensis_newGene_16495	WRKY	7.757	20.127	1.897	2.442
68	Eucalyptus_camaldulensis_newGene_32945	WRKY	2.486	1.025	21.905	4.045
69	Eucalyptus_camaldulensis_newGene_37515	WRKY	25.208	37.887	61.468	46.924
70	Eucalyptus_camaldulensis_newGene_37943	WRKY	0.701	0.738	1.055	4.141
71	Eucalyptus_camaldulensis_newGene_3901	WRKY	10.076	12.771	3.055	16.301
72	Eucalyptus_camaldulensis_newGene_39558	WRKY	1.111	1.181	2.964	0.258
73	Eucalyptus_camaldulensis_newGene_40043	WRKY	1.987	0.695	2.117	0.429
74	Eucalyptus_camaldulensis_newGene_45150	WRKY	21.483	30.263	38.403	7.041
75	Eucalyptus_camaldulensis_newGene_68345	WRKY	0.424	0.236	1.455	3.937
76	Gene006527	WRKY	10.331	19.468	31.433	11.446
77	Gene008356	WRKY	0.105	0.294	0.62	0.528
78	Gene009766	WRKY	1.793	1.691	0.127	3.58
