# Supplementary material for: Comparative transcriptomics analysis of contrasting varieties of Eucalyptus camaldulensis reveals wind resistance genes
Source: PeerJ journal article supplement (doi:10.7717/peerj.12954), 2022-02-24

C037\_0h VS C037\_24h

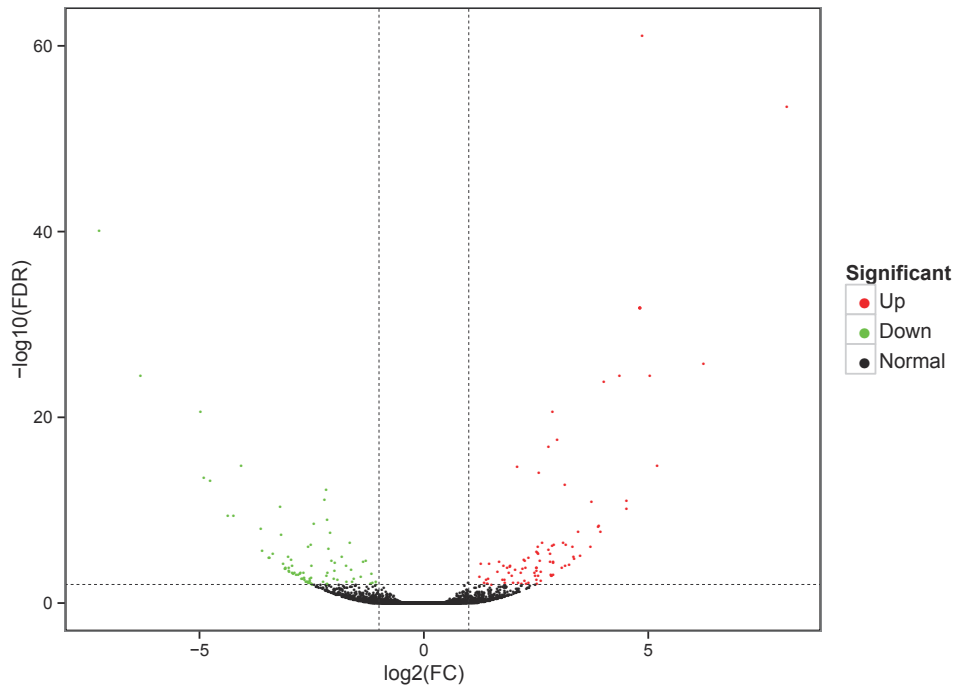

C037\_0h VS CA5\_0h

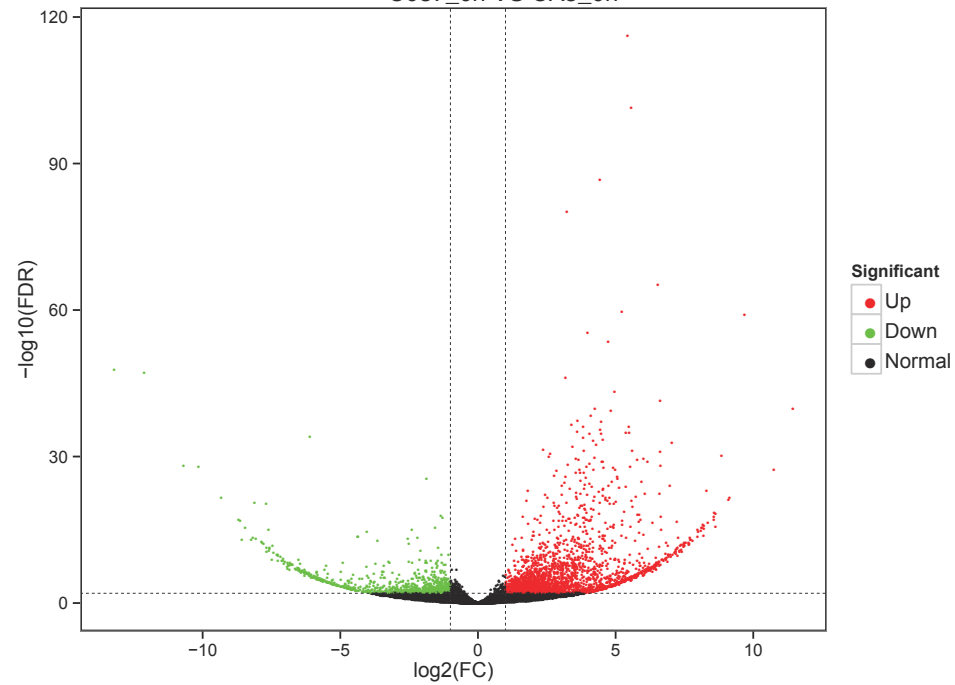

C037\_24h VS CA5\_24h

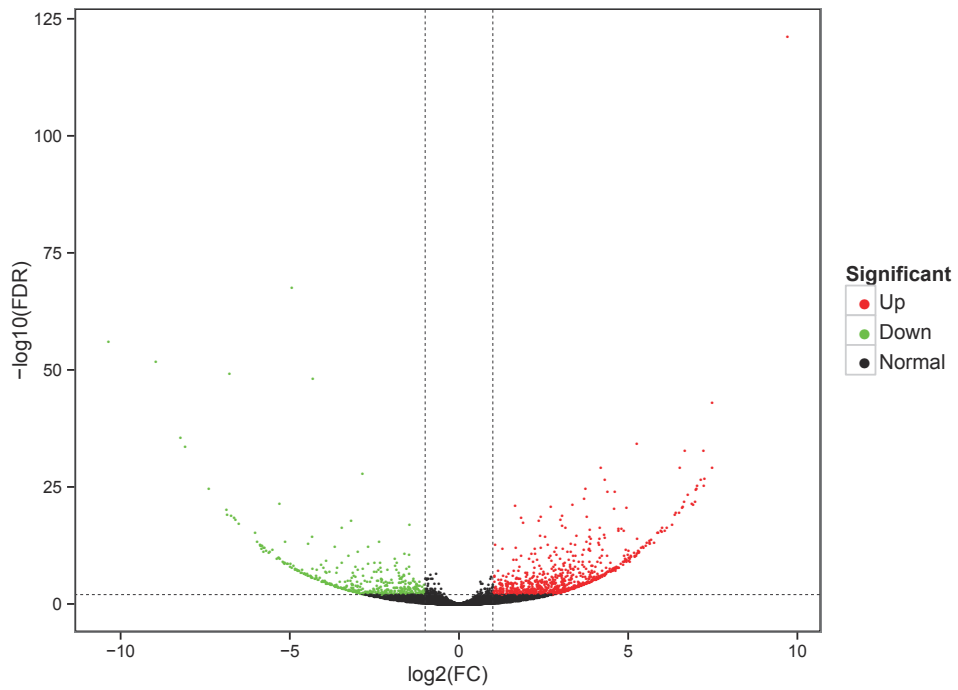

CA5\_0h VS CA5\_24h

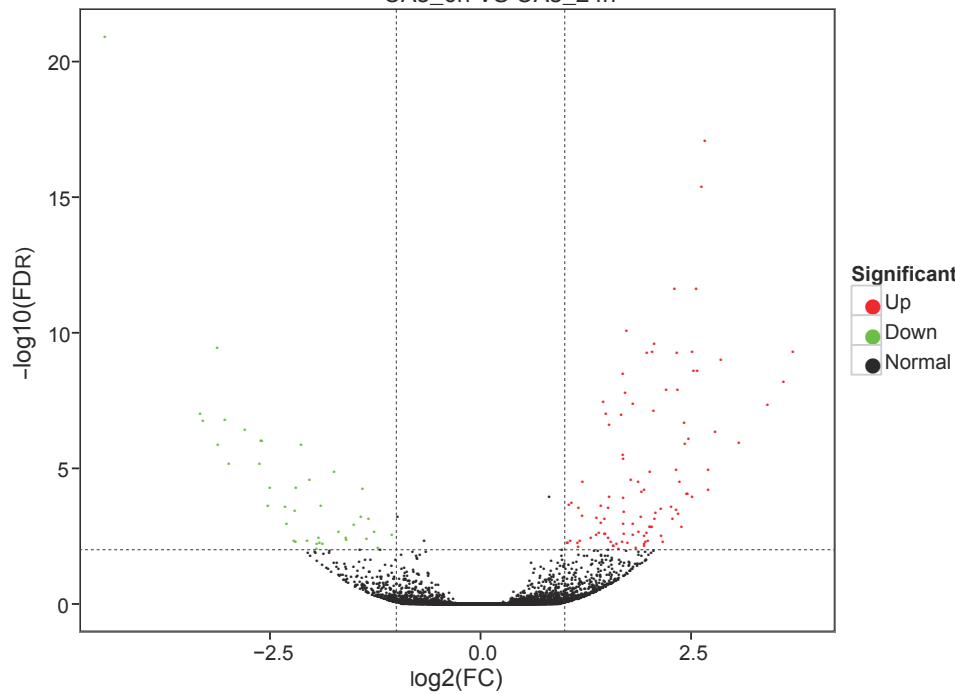

Supplement: Table_S10_Volcano_plots_representing_differentially_expressed_genes.pdf [file Table_S10_Volcano_plots_representing_differentially_expressed_genes.pdf]
